# Supplementary material
Source: PubMed Central journal article supplement (PMC4191923)

## **Supplementary materials**

### **Composition and sources of PM<sub>2.5</sub> across urban and rural sites in the Midwestern United States**

**Shuvashish Kundu<sup>a</sup>, Elizabeth. A. Stone<sup>a,\*</sup>**

<sup>a</sup>Department of Chemistry, University of Iowa, Iowa City, IA 52242, United States

\*Corresponding author phone: +1-319-384-1863; fax: +1-319-335-1270; e-mail: [betsy-stone@uiowa.edu](mailto:betsy-stone@uiowa.edu)

**Table S1.** Statistical significance (p-value) of the non-parametric tests of U of Mann-Whitney (upper matrix) and Z of Kolmogorov-Smirnov (lower matrix) tests for secondary inorganic tracers and bulk organic carbon (OC and EC). Results in bold correspond to significant differences between the two sites (the null hypothesis is rejected) with  $p > 0.05$ .

| <b>Secondary Inorganic Tracers</b> |                              |                               |                              |                              |                               |                              |                              |                               |                              |                               |                              |                               |                              |
|------------------------------------|------------------------------|-------------------------------|------------------------------|------------------------------|-------------------------------|------------------------------|------------------------------|-------------------------------|------------------------------|-------------------------------|------------------------------|-------------------------------|------------------------------|
| Sites                              | Cedar Rapids                 |                               |                              | Des Moines                   |                               |                              | Davenport                    |                               |                              | Montgomery                    |                              | Van Buren                     |                              |
|                                    | NH <sub>4</sub> <sup>+</sup> | SO <sub>4</sub> <sup>2-</sup> | NO <sub>3</sub> <sup>-</sup> | NH <sub>4</sub> <sup>+</sup> | SO <sub>4</sub> <sup>2-</sup> | NO <sub>3</sub> <sup>-</sup> | NH <sub>4</sub> <sup>+</sup> | SO <sub>4</sub> <sup>2-</sup> | NO <sub>3</sub> <sup>-</sup> | SO <sub>4</sub> <sup>2-</sup> | NO <sub>3</sub> <sup>-</sup> | SO <sub>4</sub> <sup>2-</sup> | NO <sub>3</sub> <sup>-</sup> |
| Cedar Rapids                       |                              |                               |                              | 0.43                         | 0.52                          | 0.10                         | 0.36                         | 0.15                          | 0.90                         | 0.06                          | 0.06                         | 0.42                          | 0.07                         |
| Des Moines                         | 0.50                         | 0.69                          | 0.06                         | 0                            | 1                             | 0                            | 0.07                         | <b>0.02</b>                   | 0.16                         | 0.25                          | 0.71                         | 0.91                          | 0.94                         |
| Davenport                          | 0.69                         | 0.33                          | 0.97                         | 0.33                         | 0.06                          | 0.33                         | 3                            | <b>7</b>                      | 3                            | <b>0.00</b>                   | 0.12                         | <b>0.03</b>                   | 0.11                         |
| Montgomery                         | -                            | 0.15                          | 0.21                         | -                            | 0.38                          | 0.21                         | -                            | <b>0.00</b>                   | 0.33                         | -                             | -                            | 0.35                          | 0.89                         |
| Van Buren                          | -                            | 0.69                          | 0.21                         | -                            | 0.87                          | 0.69                         | -                            | 0.12                          | 0.33                         | 0.56                          | 0.69                         | -                             | -                            |
|                                    |                              | 9                             | 1                            |                              | 8                             | 9                            |                              | 4                             | 6                            | 8                             | 9                            |                               |                              |

| <b>Organic and Elemental Carbon</b> |              |              |              |              |              |              |              |              |              |              |
|-------------------------------------|--------------|--------------|--------------|--------------|--------------|--------------|--------------|--------------|--------------|--------------|
| Sites                               | Cedar Rapids |              | Des Moines   |              | Davenport    |              | Montgomery   |              | Van Buren    |              |
|                                     | OC           | EC           |
| Cedar Rapids                        |              |              | 0.890        | 0.443        | 0.359        | 0.058        | <b>0.001</b> | <b>0.001</b> | <b>0.001</b> | <b>0.001</b> |
| Des Moines                          | 1.000        | 0.841        |              |              | 0.359        | 0.279        | <b>0.001</b> | <b>0.001</b> | <b>0.001</b> | <b>0.001</b> |
| Davenport                           | 0.591        | 0.194        | 0.591        | 0.194        |              |              | <b>0.001</b> | <b>0.001</b> | <b>0.001</b> | <b>0.001</b> |
| Montgomery                          | <b>0.001</b> | <b>0.001</b> | <b>0.001</b> | <b>0.001</b> | <b>0.001</b> | <b>0.001</b> |              |              | 0.392        | 0.855        |
| Van Buren                           | <b>0.001</b> | <b>0.001</b> | <b>0.001</b> | <b>0.001</b> | <b>0.002</b> | <b>0.001</b> | 0.358        | 0.697        |              |              |

**Table S2.** Statistical significance (p-value) of the non-parametric tests of U of Mann-Whitney (upper matrix) and Z of Kolmogorov-Smirnov (lower matrix). Results in bold correspond to significant differences between the two sites (the null hypothesis is rejected) with  $p > 0.05$ .

| <b>Crustal tracers</b> |              |       |              |              |       |              |              |              |              |              |              |              |              |              |              |
|------------------------|--------------|-------|--------------|--------------|-------|--------------|--------------|--------------|--------------|--------------|--------------|--------------|--------------|--------------|--------------|
| Sites                  | Cedar Rapids |       |              | Des Moines   |       |              | Davenport    |              |              | Montgomery   |              |              | Van Buren    |              |              |
|                        | Al           | Ca    | Si           | Al           | Ca    | Si           | Al           | Ca           | Si           | Al           | Ca           | Si           | Al           | Ca           | Si           |
| Cedar Rapids           |              |       |              | 0.517        | 0.853 | 0.302        | 0.322        | 0.154        | 0.955        | <b>0.001</b> | <b>0.027</b> | <b>0.001</b> | <b>0.002</b> | 0.928        | <b>0.001</b> |
| Des Moines             | 0.878        | 0.878 | 0.504        |              |       |              | 0.566        | 0.123        | 0.295        | <b>0.001</b> | <b>0.020</b> | <b>0.001</b> | <b>0.008</b> | 0.946        | <b>0.001</b> |
| Davenport              | 0.504        | 0.336 | 1.000        | 0.878        | 0.336 | 0.504        |              |              |              | <b>0.004</b> | <b>0.001</b> | <b>0.001</b> | <b>0.031</b> | 0.207        | <b>0.031</b> |
| Montgomery             | <b>0.001</b> | 0.053 | <b>0.001</b> | <b>0.004</b> | 0.058 | <b>0.001</b> | <b>0.002</b> | <b>0.003</b> | <b>0.001</b> |              |              |              | 0.356        | <b>0.031</b> | <b>0.039</b> |
| Van Buren              | <b>0.018</b> | 0.979 | <b>0.001</b> | <b>0.018</b> | 0.979 | <b>0.004</b> | <b>0.009</b> | 0.504        | 0.069        | 0.504        | 0.144        | 0.080        |              |              |              |

  

| <b>Anthropogenic tracers</b> |              |              |              |              |              |              |              |              |              |              |              |              |              |              |              |
|------------------------------|--------------|--------------|--------------|--------------|--------------|--------------|--------------|--------------|--------------|--------------|--------------|--------------|--------------|--------------|--------------|
| Sites                        | Cedar Rapids |              |              | Des Moines   |              |              | Davenport    |              |              | Montgomery   |              |              | Van Buren    |              |              |
|                              | Fe           | Zn           | Pb           |
| Cedar Rapids                 |              |              |              | 0.308        | 0.127        | 0.982        | <b>0.001</b> | <b>0.001</b> | <b>0.001</b> | 0.362        | <b>0.007</b> | 0.099        | <b>0.004</b> | <b>0.031</b> | 0.813        |
| Des Moines                   | 0.336        | 0.211        | 0.878        |              |              |              | <b>0.001</b> | <b>0.001</b> | <b>0.001</b> | 0.919        | 0.323        | 0.108        | <b>0.001</b> | 0.835        | 0.928        |
| Davenport                    | <b>0.001</b> | <b>0.009</b> | <b>0.001</b> | <b>0.002</b> | <b>0.001</b> | <b>0.001</b> |              |              |              | <b>0.001</b> | <b>0.001</b> | <b>0.001</b> | <b>0.001</b> | <b>0.001</b> | <b>0.001</b> |
| Montgomery                   | 0.878        | <b>0.011</b> | 0.124        | 0.979        | 0.366        | 0.124        | <b>0.001</b> | <b>0.001</b> | <b>0.001</b> |              |              |              | <b>0.001</b> | 0.309        | 0.110        |
| Van Buren                    | <b>0.004</b> | <b>0.018</b> | 0.878        | <b>0.001</b> | 0.699        | 0.699        | <b>0.001</b> | <b>0.001</b> | <b>0.001</b> | <b>0.001</b> | <b>0.408</b> | <b>0.124</b> |              |              |              |

**Figure S1.** A representative set of PMF factors deduced from PM<sub>2.5</sub> speciation data from the Van Buren site. The left axis shows the log-transformed PM<sub>2.5</sub> mass fraction of each species, whereas the right axis shows the percent of species attributed to that factor. The error bar shows the model uncertainty as one standard deviation.

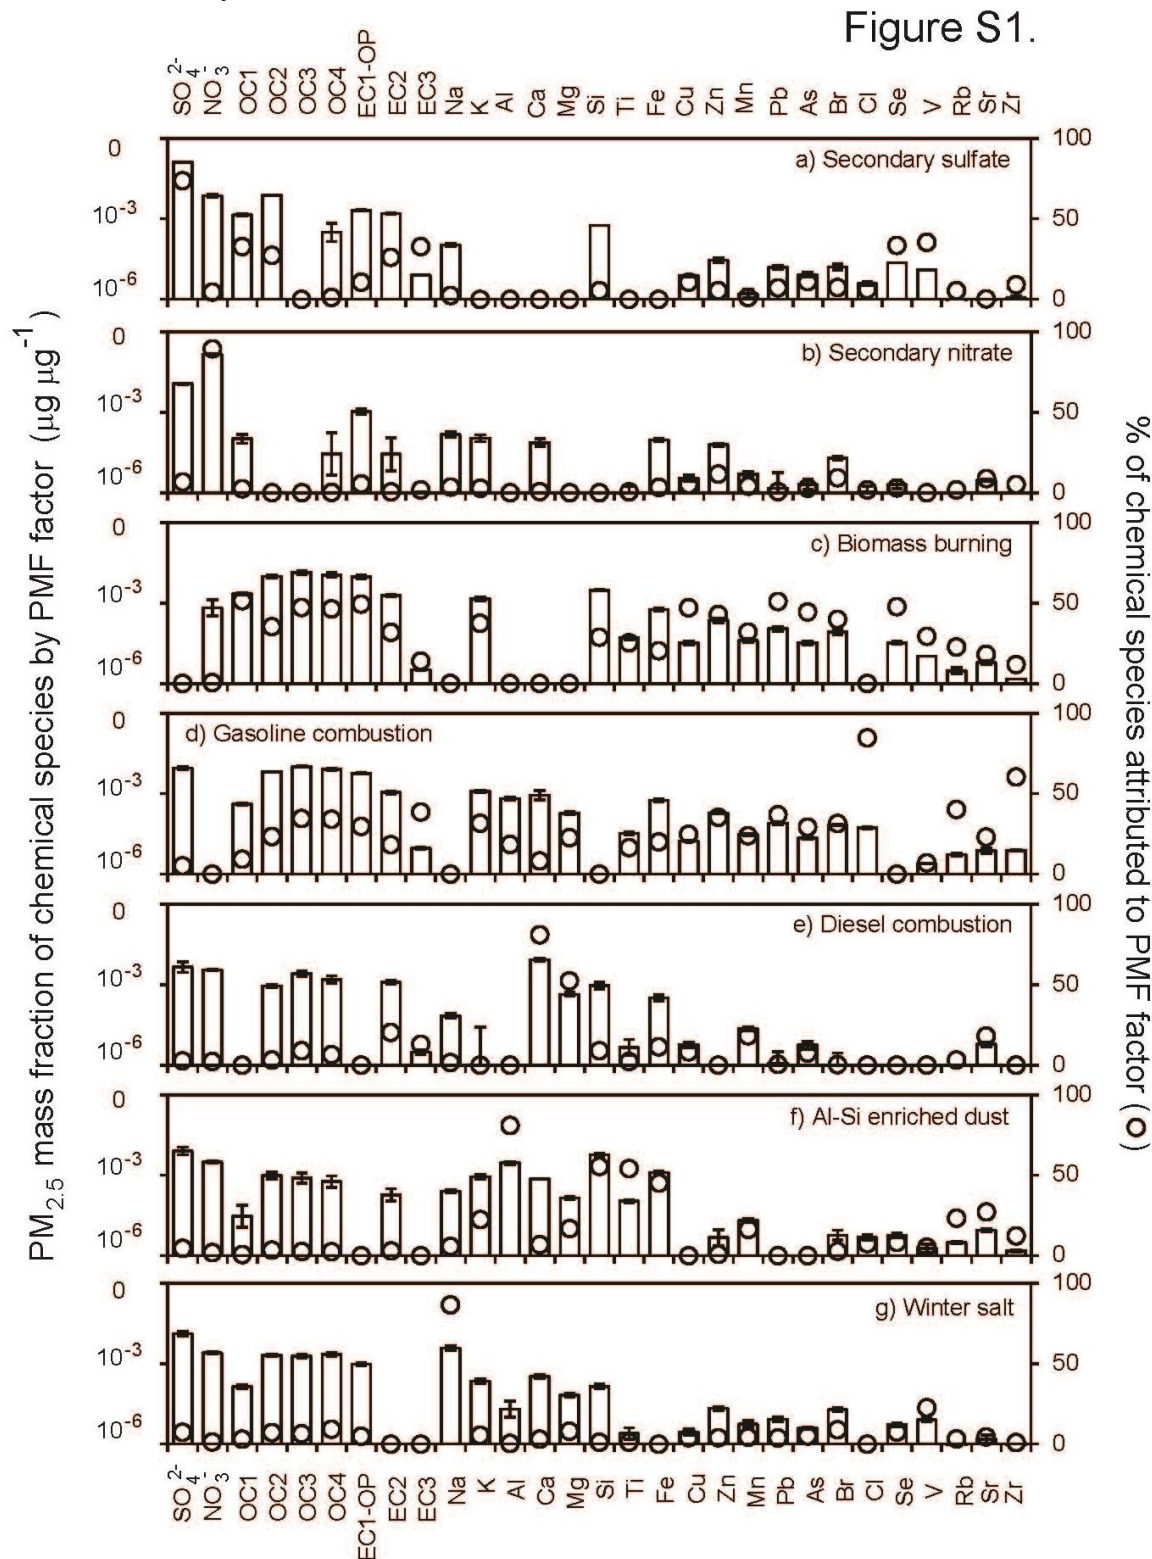

Supplement: NIHMS587160-supplement-ESI.pdf [file NIHMS587160-supplement-ESI.pdf]
